# Supplementary material for: The orphan ligand, activin C, signals through activin receptor-like kinase 7
Source: eLife journal article supplement (doi:10.7554/elife.78197), 2022-06-10
Supplement: data1 [file ActC_Figure1_SourceFile.xlsx]

## Sheet: Sheet1
Figure 1C, left, untransfected CAGA
	Log [M] Ligand	ActA												ActAC												ActC												ActB
	-8.30452	350.281	328.317	311.184							360.738	373.732	401.076				160.575	147.093	149.508	85.9941	87.3605	85.2297	150.589	148.665	166.708							1.21579	1.10459	0.98265	1.57849	1.93729	1.25457	117.902	100.448	174.734	164.297	165.973	166.249	166.88
	-8.60555	295.482	290.355	285.875	271.132	270.814	247.916	214.763	224.335	194.345	397.403	384.186	385.665	101.589	113.386	110.157	126.957	113.642	117.389	45.2326	52.5172	44.745	42.6046	69.8625	65.3974	1.35992	1.18568	1.09765				1.18032	1.18948	1.00942	1.06188	1.12791	1.0407	117.394	97.3648	208	190.214	188.757	154.398	182.005
	-8.90658	310.514	283.457	284.591	267.404	249.234	235.254	187.521	238.728	172.686	404.035	402.046	359.218	59.4262	54.1889	58.891	79.4726	88.1522	85.2511	23.8696	23.7808	23.8861	16.0631	23.1815	19.093	1.155	1.2076	1.35042				1.25216	1.15516	1.12107	1.08804	1.18314	1.29028	117.851	102.038	220.955	199.162	177.827	191.745	176.935
	-9.20761	271.538	255.001	263.329	311.505	270.215	212.832	177.832	207.482	171.584	378.571	382.727	366.518	20.3001	21.2583	21.8003	64.0817	53.1968	64.762	11.4493	12.059	8.25929	5.14161	5.25415	6.7147	1.50384	1.14002	1.08012				1.0053	0.94673	0.902345	1.49875	1.13455	0.892442	101.784	93.2101	200.204	185.65	160.3	178.747	186.616
	-9.50864	218.696	210.984	210.244	238.912	199.49	212.29	142.543	164.929	148.62	325.449	305.749	282.363	6.29733	5.99744	6.31742	31.5818	22.1974	30.367	3.74459	4.28019	3.83268	1.88995	2.26578	2.88331	1.17947	1.16778	1.1192				0.984252	1.00233	0.943985	0.807309	0.856728	0.600498	84.491	80.1902	137.89	143.515	141.172	138.805	176.213
	-9.80967	121.962	126.88	117.505	209.138	200.799	220.14	93.01	98.8054	98.8347	197.733	212.722	196.228	2.5635	2.46195	2.38963				1.44458	1.77426	1.56698	1.53779	1.61545	1.29402	1.33617	1.29892	1.15281				0.95062	0.840801	1.01194	0.620847	0.82309	0.710548	51.8438	50.4995	54.4382	61.587	96.016	125.376	132.939
	-10.1107	48.9026	45.8526	36.4862				58.6723	51.2147	48.7097	103.324	119.777	115.961	1.54292	1.45818	1.71789				1.36725	1.42307	0.452317	1.06063	1.11836	0.97799	1.33289	1.01364	1.06149				0.963203	0.476339	0.948332	0.959718	0.729236	0.746678	34.5634	29.368	23.8154	21.9086	75.7444	88.6572	84.2153
	-10.4117	15.4683	13.0107	11.7414				29.6026	25.6301	22.4559	49.6292	57.3912	49.1844	1.35736	1.46	1.41215				1.18261	1.03321	0.961373	0.839286	1.22135	1.02948	0.966151	1.10423	1.06514				1.01857	0.957255	1.26658	0.81686	1.08015	1.11296	6.20314	8.60251	4.54191	4.82333	26.2986	23.7039	45.29
	-10.7128	3.73128	3.87008	4.49324				8.47413	8.65029	6.52827	37.5855	34.527	35.2363	1.27846	1.10203	1.57799				1.35535	1.18353	1.10757	1.25249	1.26412	1.19518	1.18458	1.28175	1.39827				0.99775	0.833022	0.831192	1.03364	1.15615	1.18314	4.32929	3.79441	1.59306	1.38788	7.69202	7.85491	12.3016
	-11.0138	2.05905	1.65652	2.10837				4.02303	4.11409	4.13377	17.7911	17.3613	18.1329	1.22111	1.13381	1.12468				1.53907	1.12336	1.14051	1.12708	1.10382	1.20847	1.2507	1.01656	1.37234				0.932316	0.916301	0.860477	1.09801	1.09012	0.899917	0.816257	1.3317	1.25405	0.88752	3.1612	2.19182	3.73157
	-11.3148							3.11794	3.52953	3.30257				1.35517	1.27225	1.45343										1.32302	1.21308	1.03592										0.915489	1.97575	1.11391	1.07064
Figure 1C, right, untransfected BRITER
	Log [M] Ligand	ActA									ActAC									ActC									ActB									BMP2
	-8.30452	0.653251	0.89266	0.678352	0.56074	0.999719	0.884388	1.37063	1.08892	1.15852	0.688519	0.674222	0.613694	0.962219	0.988087	1.06684	1.19822	1.05065	1.25276	0.860252	0.785586	1.10983	1.34594	1.07082	1.00837	1.23395	1.68325	1.23747	0.661682	0.301722	0.408438	1.50089	1.39287	0.703541	0.339137	0.924896	0.639593	8.32451	8.91739	8.18058	16.8021	14.0155	18.2997	12.9813	19.0659	23.0548
	-8.60555	0.689314	1.03675	0.808303	0.813597	1.04755	0.881939	1.11597	1.18711	1.17293	0.913948	0.736338	0.664372	0.910638	1.07403	1.04679	1.5834	1.54514	1.50093	0.98226	1.05264	0.967168	1.05765	1.17719	1.11834	1.38999	1.21152	1.28135	0.470405	0.821372	1.09392	1.228	2.56011	0.934147	0.838788	0.99228	0.749969
	-8.90658	0.780184	0.956206	0.668979	0.744873	0.903061	0.900689	1.56218	1.31126	1.15402	0.713779	0.791305	0.676922	0.984643	1.06829	0.923801	1.38735	1.3338	1.03306	1.00085	0.882652	0.858346	0.871378	1.12003	1.04449	0.725287	1.49346	1.14093	0.375315	0.254999	0.555954	6.38375	3.0604	1.81713	1.3818	1.83242	0.291586
	-9.20761	0.855486	0.776848	1.05693	0.59074	0.887066	0.797985	1.35821	1.35755	1.28443	0.996081	0.872485	0.835787	0.969949	0.912398	0.848342	1.75428	1.64091	1.28036	0.909341	1.23311	1.15383	1.23918	1.22694	2.17439	0.961148	1.35722	2.76458	0.452967	0.908017	0.920192	3.07782	5.1593	1.01125	0.523303	0.953106	0.87636
	-9.50864	0.79623	0.951599	0.795594	0.891429	0.964286	1.21607	1.37635	1.55086	1.49302	1.05709	0.661989	0.674222	0.872679	1.06217	1.11528	1.34512	0.82381	0.834805	0.553643	0.583986	0.767952	0.760638	0.689311	0.970102	0.90298	0.90353	1.16743	0.730121	1.64318	0.982379	2.21687	1.6583	2.20692	0.951874	0.654745	0.444093
	-9.80967	0.627198	0.823554	1.08489	0.786964	1.03485	0.981046	1.43595	1.38636	1.11201	0.960337	0.780184	0.743328	1.05727	0.956174	0.972321	1.28234	1.32654	0.878349	0.587958	0.888371	0.812751	1.24401	0.822321	1.01755	1.19591	1.14676	0.811824	0.47556	0.589624	1.54733	2.09463	1.54282	0.999882	0.598571	0.433376	0.410216
	-10.1107	1.31762	0.993857	0.909023	0.764923	0.923112	1.11658	1.48169	1.30906	1.11905	0.466109	0.632123	0.859299	0.966429	0.949209	0.950357	1.19569	1.12444	1.06605	0.918555	0.774783	0.847861	1.03645	0.861811	0.963597	0.913426	1.11124	1.10673	0.22429	0.634482	0.375973	1.2383	0.811915	1.19247	1.32193	0.472426	0.311666
	-10.4117	1.03469	1.2393	1.17576	0.547117	0.886684	0.944617	1.30367	1.46245	1.02031	0.718862	0.851356	0.916014	1.27293	1.03332	0.904439	1.32412	1.25672	1.04933	0.995287	0.823237	0.610358	0.919362	0.887296	0.983036	0.913426	1.30224	1.32819	0.301503	0.307425	0.945527	1.26318	1.19851	0.831103	0.691824	0.506303	0.511723
	-10.7128	0.876456	0.715368	0.851514	0.824694	0.74824	1.10349	1.2554	1.1892	0.889015	0.619572	0.584145	0.744122	1.24821	0.951199	0.975383	1.39911	1.22527	1.30356	0.985437	0.780979	0.852785	1.41888	1.03339	0.910867	0.856907	1.19635	1.32621	0.658392	0.527109	0.392864	1.08836	0.805164	1.3147	0.922309	0.489919	0.5711
	-11.0138	0.90807	0.616395	0.79893	0.92648	0.979515	1.17826	1.22494	1.78496	1.36074	0.605433	0.817676	0.775736	0.972857	1.01487	0.936352	1.50951	1.42308	1.34985	0.699481	0.919985	0.892819	1.36332	0.916607	0.848954	1.85357	1.11586	1.46608	0.725953	0.283954	0.214748	0.89968	0.941253	3.42426	0.581078	0.82302	0.991418
Figure 1D, ALK4 ST
	Log [M] Ligand	ActA									ActAC									ActC									ActB
	-8.30452	125.902	160.199	143.347	138.06	107.427	93.9616	60.3481	79.496	71.8503	111.247	108.796	79.9576	99.8636	98.8972	101.239	109.846	120.054	70.1003	51.1998	28.8502	40.2756	22.1028	22.3965	23.0083	35.369	24.6865	14.7188	146.014	103.956	94.5082	50.6198	49.7316	36.9606	96.4325	82.9404	61.7689
	-8.60555	124.568	125.21	157.804	81.8115	81.2012	80.1189	58.6419	70.0979	90.8635	106.458	110.433	102.276	86.1831	86.4678	90.1221	109.342	96.241	66.8307	45.8669	37.4853	33.3396	18.1543	18.3629	24.8276	29.8489	21.7125	24.3469	112.331	94.7758	95.1365	43.2944	41.7781	43.251	70.897	58.8564	55.5168
	-8.90658	135.447	135.046	145.653	74.2755	66.8664	69.2652	62.0588	62.8284	73.2371	106.795	126.262	106.436	88.3294	93.1214	79.697	64.1063	71.4851	64.0489	36.3898	34.1826	37.4781	16.5157	15.8744	21.6363	18.8779	23.2663	23.8531	108.189	99.2268	97.3365	36.8734	35.8142	30.9062	54.2126	45.8762	42.9781
	-9.20761	92.2155	90.1272	123.448	70.8388	52.9706	59.5163	51.0893	49.0122	49.1996	100.095	88.5888	93.0486	73.2079	72.715	74.7787	35.9492	47.2738	32.1399	40.3521	35.9491	39.4293	19.7437	17.2143	17.5536	22.574	27.5307	20.9235	109.232	103.924	94.1407	28.112	34.2149	41.4206	52.2524	44.8169	45.1411
	-9.50864	61.9661	84.9118	84.852	52.2429	43.008	41.8883	29.8774	34.4801	39.9932	84.27	75.7412	60.545	72.8397	69.391	61.9956	29.3807	29.437	30.4029	23.9978	28.5387	23.5351	18.3723	15.9983	21.3342	18.916	23.7778	17.4084	95.1706	92.3335	95.3956	29.4895	26.9812	24.5991	56.3223	39.9537	44.8521
	-9.80967	61.9782	71.5915	67.2981	34.9784	26.6493	38.5848	25.6231	30.0994	26.3882	58.062	45.6916	54.3923	54.6737	46.2182	44.4669	25.7045	31.784	31.4938	21.9791	31.1784	16.3585	20.4053	19.2309	20.7822	17.4868	14.5451	21.4243	82.6489	84.9651	89.6473	20.9187	16.2122	21.8114	35.8799	29.0878	31.8182
	-10.1107	45.938	51.4832	55.2946	23.4932	20.4725	26.8819	17.3169	22.1986	17.8604	32.8877	33.002	35.4035	40.8534	49.4602	37.4966	20.7638	32.6233	23.573	28.4059	25.0573	23.071	19.9129	18.6523	22.4941	22.3481	17.6326	19.3383	67.4453	67.2051	73.8679	11.8717	12.8118	12.5504	25.182	21.7095	20.9028
	-10.4117	42.224	41.6488	42.5044	20.5223	16.8996	23.33	21.9183	19.3999	20.3343	29.0754	36.2352	27.6983	37.2534	36.7809	35.9555	30.2412	28.3428	25.7137	23.042	26.8019	25.8747	23.4133	20.7124	19.4579	15.7165	22.4948	16.7544	65.4555	45.1378	47.1992	9.50908	9.86525	8.39807	18.2293	17.6053	16.789
	-10.7128	36.8544	25.1015	29.3315	21.739	17.182	24.9387	17.4565	22.5402	19.009	31.3687	29.9699	30.416	29.9365	25.1593	31.2818	19.8403	20.9422	12.1816	25.7293	22.8611	24.6777	18.048	23.378	18.8965	19.8683	23.7344	18.4026	25.2172	27.7624	31.7167	7.92236	7.48173	8.73953	12.2337	12.5317	10.7859
	-11.0138	33.7981	32.9238	32.4864	20.1754	20.9162	17.3676	23.8311	21.3938	12.8743	29.7766	28.832	34.2833	24.9242	26.1163	24.4794	16.4767	19.3172	17.7263	30.9302	33.2911	21.1502	19.4261	17.6529	18.4258	19.3454	23.363	17.5978	19.864	20.9118	21.8786	5.03204	6.09068	5.69053	9.31967	8.46707	9.51805
Figure 1D, ALK5 ST
	Log [M] Ligand	ActA											ActAC											ActC											ActB											GDF11
	-8.30452						1.11146	1.25058	1.45164	0.965297	1.01381	0.83682						1.44014	1.18842	1.06765	1.11138	1.22222	0.998915						1.27147	1.35202	1.29568	1.22201	0.992648	0.891507	1.54413	1.66598	1.61052	1.41236	1.29006	1.39324	1.08934	1.10339	1.22579
	-8.60555						1.35578	1.4937	1.50838	1.0195	0.894656	0.959104						1.33299	1.37488	1.15251	1.11648	1.13367	0.998286						1.35321	1.285	1.11151	0.951457	0.841739	0.999245	1.26304	1.18492	1.50615	1.27081	1.44385	1.3817	1.52115	1.50877	1.33537
	-8.90658	1.51053	1.38472	1.58763	1.52826	1.36031	1.28838	1.4768	1.84349	0.941515	0.910865	0.916908	1.26013	1.29299	1.44784	1.40344	2.04861	1.25255	1.2534	1.17029	0.941515	0.98683	1.00793						0.904842	1.34224	1.1952	0.995826	0.82211	1.03043	1.42903	1.52997	1.51713	1.34024	1.2198	1.27751	1.63527	1.47634	1.32767
	-9.20761	1.24218	1.55997	1.42027	1.46214	1.32077	1.20503	1.47278	1.35742	0.958144	0.88194	1.088	1.34261	1.2773	1.38476	1.24286	1.82804	1.23969	1.63552	1.1238	1.03643	1.03889	1.03268						0.960012	1.05083	1.17842	0.869165	0.967996	0.994852	1.21789	1.5269	1.57821	1.40319	1.23508	1.1744	1.30972	1.1883	1.51001			17.5935	15.3262	17.3834	20.9797
	-9.50864	1.26093	1.32204	1.65904	1.51891	1.41696	1.32993	1.44757	1.60213	0.947708	0.919007	1.03985	1.34398	1.16363	1.35332	1.00583	1.07455	1.1776	1.26388	0.984777	0.985945	0.983396	1.05024						0.662694	1.23998	0.878163	1.08557	0.926295	0.788627	1.52085	1.3894	1.31684	1.22528	1.13941	1.19257	1.43144	1.36902	1.26957
	-9.80967	1.33172	1.48695	1.57024	1.49305	1.34255	1.18574	1.39962	1.27793	0.864216	1.06786	0.998571	1.4018	1.67578	1.52931	1.46474	1.26325	1.24687	1.32884	1.06846	0.893381	1.0019	0.986365						0.846253	1.18001	0.956645	1.01177	1.01516	0.909801	1.49435	1.36836	1.6094	1.0523	1.15108	1.14298	1.4959	1.33768	1.12224
	-10.1107	0.933927	1.2786	1.47516	1.28798	1.36666	1.12064	1.90868	1.91109	0.85384	0.969181	0.887893	1.31149	1.46195	1.31607	1.31285	1.30245	1.32375	1.32344	1.21742	1.22333	0.913579	0.944169						0.929385	1.2985	0.821488	1.10604	0.99971	0.751694	1.3095	1.4439	1.25483	1.22582	1.22783	1.36172	1.02362	1.1153	1.01072
	-10.4117	0.744233	1.04587	1.23497	1.31285	1.11567	1.38919	1.53168	1.35637	0.731316	0.917313	1.00361	1.38336	1.36019	1.15957	1.34385	1.30233	1.45333	1.16789	1.11023	1.14795	0.9853	1.03087						1.26928	1.23855	0.851364	0.972029	0.998301	0.842743	1.11477	1.20687	1.30714	1.01528	1.11516	1.11327	1.10761	1.11217	0.917326
	-10.7128	0.969044	1.26431	1.34187	1.43101	1.26409	1.01814	1.11382	1.01147	0.775446	0.933628	0.806906	1.47999	1.56	1.3368	1.186	1.43754	1.06282	1.31031	1.27493	1.25585	0.953211	0.914989						0.978043	1.436	0.732221	1.07639	1.00941	1.02409	1.33618	1.02419	1.13175	1.02369	0.982476	1.10729	1.07872	1.00488	1.06767
	-11.0138	0.953853	1.0106	1.3497	1.55468	1.10119	1.2373	1.25195	0.978659	0.910685	0.863062	0.833477	1.39645	1.52566	1.54707	1.17904	1.19079	1.17153	1.31426	1.08175	1.08095	0.902993	0.844768						0.94246	1.61216	0.899134	1.10448	1.07073	0.846327	1.20505	1.11029	1.26531	0.957538	1.11636	1.04947	1.27069	1.19878	1.18457
Figure 1D, ALK7 ST
	Log [M] Ligand	ActA									ActAC									ActC									ActB
	-8.30452	34.8416	32.5466	34.767	43.2172	40.3629	36.2388	43.8316	34.0228	39.1934	91.571	113.254	95.175	105.977	106.83	87.1929	117.561	96.7571	85.6823	104.992	97.3492	90.3027	110.487	115.932	93.2154	67.4405	90.823	77.3433	106.613	96.1014	97.2858	89.1299	110.704	100.166	93.9998	100.472	105.528
	-8.60555	29.0181	29.2678	30.1707	30.8159	32.0308	37.022	25.1877	22.7339	19.1284	92.2448	119.232	83.671	108.943	110.584	95.2189	92.4055	86.4768	77.5584	82.517	85.9418	94.9198	104.033	108.003	88.5462	72.4739	92.5217	73.911	99.4138	97.8804	97.1468	83.8884	81.7486	83.4336	108.85	103.853	93.0609
	-8.90658	29.3202	36.9353	33.7102	30.3095	33.344	31.0223	16.251	13.8154	15.4155	89.208	91.0309	111.179	118.757	132.121	119.078	84.4848	99.7461	80.7873	84.1535	90.4428	93.6586	74.9013	92.1612	84.3046	70.0241	59.3433	55.6892	91.8823	87.3107	89.0885	75.8774	73.0429	89.6731	97.9983	100.443	90.4876
	-9.20761	20.8723	25.9115	22.1691	23.892	27.3822	28.238	9.00561	10.5039	7.98418	88.8666	96.7861	83.4417	111.99	78.7931	94.9974	84.9434	86.9248	82.8606	64.6207	71.63	67.8745	87.0692	69.1027	66.1173	59.1568	49.7577	64.7305	77.4008	77.0507	68.1034	69.4681	71.9162	73.8771	120.584	120.065	120.702
	-9.50864	17.4815	17.3464	15.5999	25.3512	29.6485	26.6125	4.3761	4.744	4.31921	73.675	74.9119	73.7706	83.3598	64.5618	90.3839	75.1466	87.8671	74.1142	37.1886	23.6828	34.4752	60.8085	52.1559	68.7409	57.3609	54.4522	51.2629	75.9209	83.4791	79.896	55.9388	50.4118	62.6765	127.47	94.1924	109.483
	-9.80967	10.3299	12.6425	11.6727	29.4869	32.1201	32.6331	2.75365	3.72209	2.81727	51.1947	55.9806	56.866	63.3083	46.7994	64.9167	63.9564	70.8666	47.5769	32.3284	27.1227	24.9983	42.4801	65.5912	49.4423	38.0294	38.6748	34.954	78.921	82.9976	67.9271	38.9693	49.8786	61.5339	62.6698	80.9015	89.9258
	-10.1107	8.56632	10.5662	9.73263	27.2233	36.0916	27.3253	3.06561	3.65895	2.4679	25.3625	24.5176	29.6917	52.0577	42.8492	57.0229	82.6978	79.8239	70.5726	20.5768	20.0249	18.9563	40.4171	48.3912	47.6684	27.2975	22.9859	23.4909	78.9762	74.9671	65.3239	22.6992	27.7159	54.9055	46.5307	43.6209	49.2565
	-10.4117	9.12734	10.0419	9.34735	28.2005	30.4873	28.7637	2.11463	3.43729	2.00487	23.5647	26.307	24.0003	44.3753	44.1508	41.2895	48.5535	53.1843	53.7517	16.2552	14.5915	11.6988	35.4642	47.4295	29.4487	15.7735	15.4485	16.6377	60.7746	62.3506	57.8827	17.2098	14.9742	43.0674	27.4404	28.6161	32.1418
	-10.7128	9.48819	8.33397	7.69637	28.4146	27.8708	30.8066	2.71954	2.69369	3.29376	17.0947	12.6998	16.7525	50.5126	32.3845	40.3285	33.8272	39.9492	30.9373	12.6359	11.6467	11.4676	32.6192	41.615	26.0756	10.9526	7.81232	9.41246	41.0138	38.3117	39.7224	11.6695	11.8104	25.1881	19.0918	17.1294	19.0939
	-11.0138	8.70001	8.99711	7.73867	29.6821	29.5186	25.0246	3.44354	2.13328	2.85835	12.6006	14.2267	13.1891	34.0633	32.5689	26.1131	22.3295	27.7616	25.7877	10.5632	10.695	9.29839	31.8518	38.0958	27.5186	8.80567	4.36784	5.95594	25.5191	25.0623	21.5784	11.3157	10.8111	11.4063	13.9124	12.7169	13.2268
Figure 1E
	ActA	ActA+nAb	ActB	ActB+nAb	ActC	ActC+nAb
	100.62	107.44	75.5216	21.6326	77.2639	32.1916
	104.565	91.0964	122.668	65.5041	99.29	34.8685
	92.1482	79.1559	101.81	62.2469	123.446	35.5561
	107.233	70.9047
	98.8584	75.5641	61.4933	0	90.4994	9.80254
	96.575	111.827	112.226	0	137.454	0
			126.281	67.5523	72.0469	5.61971
	107.76	159.422
	90.4555	129.815	107.273	83.361	153.602	0
	91.7516	162.228	95.4829	48.2084	69.4519	0
	120.388	178.961	97.2444	66.6814	76.9457	0
	88.7613	148.152		67.4135
	100.884	0		0	113.752	51.0841
				57.6111	74.7144	12.0653
					111.534	0
			104.626	42.4185		0
			99.3408	40.5539		23.5076
			86.5799	37.7427		0
			94.4257	72.2028
			107.386	78.4765	87.0236	0
			107.641	3.99976	103.094	1.92544
					109.883	7.17781
			103.049	28.5645
			111.17	28.1389	99.1409	2.83445
			85.7804	18.5355	105.259	0.968501
					95.6002	0
[truncated: 5 more columns]
