# Supplementary material for: The orphan ligand, activin C, signals through activin receptor-like kinase 7
Source: eLife journal article supplement (doi:10.7554/elife.78197), 2022-06-10
Supplement: data1 [file ActC_Figure3_SourceFile.xlsx]

## Sheet: Sheet1
Figure 3B
	ActA-ALK4st					ActAC-ALK4st					ActAC-ALK7					ActC-ALk7st					ActB-ALK7st
	0nM ActRIIA-Fc	6.25nM ActRIIA-Fc	12.5nM ActRIIA-Fc	25nM ActRIIA-Fc		0nM ActRIIA-Fc	6.25nM ActRIIA-Fc	12.5nM ActRIIA-Fc	25nM ActRIIA-Fc		0nM ActRIIA-Fc	6.25nM ActRIIA-Fc	12.5nM ActRIIA-Fc	25nM ActRIIA-Fc		0nM ActRIIA-Fc	6.25nM ActRIIA-Fc	12.5nM ActRIIA-Fc	25nM ActRIIA-Fc		0nM ActRIIA-Fc	6.25nM ActRIIA-Fc	12.5nM ActRIIA-Fc	25nM ActRIIA-Fc
	90.6132	96.575	57.543	69.7221		100.857	93.3736	67.9307	58.3084		81.4971	124.912	91.0043	77.3601		155.233	196.428	95.7629	123.895		17.5933	22.3573	20.1584	20.5139
	103.793	58.3546	53.435	64.9828		98.9421	88.5587	78.5302	62.6472		126.62	113.512	77.1603	75.6814		85.3128	149.969	150.112	161.81		155.589	21.2525	25.5023	23.2207
	105.594	62.1617	63.3321	54.5936		100.201	89.4702	63.3042	51.3343		91.8831	104.716	112.132	61.2838		59.4541	134.909	86.9222	98.1368		126.818	27.1618	30.4586	17.6163
	55.0549	102.998	53.0885	96.28		109.96		44.4095	41.6449		95.7062	129.572	107.204	91.8497		88.0858	82.9064	95.2715	126.528		93.7643	5.35541	2.79686	1.95434
	141.382	115.979	78.732	50.3418		92.2101		44.3877	40.2875		118.743	140.454	137.67	123.073		115.495	105.164	103.478	151.388		102.272	6.30647	3.01955	2.61237
	103.563	45.1994	58.9185	31.9394		97.8299		36.1898	27.0866		85.5512	90.3315	100.243	91.2631		96.4195	96.2878	108.859	129.029		103.964	7.15519	2.49911	1.87072
	110.276	61.7231	56.7001	29.8513							95.4081	110.168	101.86	93.8875		97.8371	91.433	101.975	117.406		108.715	18.8137	10.5407	11.7801
	102.346	65.6433	50.1527	29.8704							98.122	115.15	111.878	107.108		101.961	103.733	109.324	131.199		90.9805	11.7881	12.5418	13.0564
	87.3784	66.0104	38.9614	18.434							106.47	102.785	124.818	107.7		100.202	82.2245	78.0888	118.751		100.305	10.4282	7.9029	3.92538
	100.62	43.9594	33.746	26.8911
	104.565	43.2449	34.8297	22.3098
	92.1482	47.2431	34.9521	21.6796
	107.233
	98.8584
Figure 3C
	ActA-ALK4st					ActAC-ALK4st					ActAC-ALK7					ActC-ALk7st					ActB-ALK7st
	0nM ActRIIB-Fc	6.25nM ActRIIB-Fc	12.5nM ActRIIB-Fc	25nM ActRIIB-Fc		0nM ActRIIB-Fc	6.25nM ActRIIB-Fc	12.5nM ActRIIB-Fc	25nM ActRIIB-Fc		0nM ActRIIB-Fc	6.25nM ActRIIB-Fc	12.5nM ActRIIB-Fc	25nM ActRIIB-Fc		0nM ActRIIB-Fc	6.25nM ActRIIB-Fc	12.5nM ActRIIB-Fc	25nM ActRIIB-Fc		0nM ActRIIB-Fc	6.25nM ActRIIB-Fc	12.5nM ActRIIB-Fc	25nM ActRIIB-Fc
	129.478	25.5331	20.4385	28.1222		109.345	105.63	50.2869	29.7228		104.465	144.962	120.21	70.2103		135.518		176.368	167.649		71.013	11.7713	12.2298	11.8851
	95.9591	27.2375	24.4061	28.7531		99.7183	118.911	48.7603	42.4723		90.5219	107.584	138.697	93.6971		88.615	167.096	178.573	107.879		88.992	13.8102	11.3021	11.7104
	74.5625	32.0664	22.7227	24.3543		90.9372	110.261	57.5905	47.1557		105.013	106.675	65.2294	81.0643		75.8675	144.454	144.65	125.228		139.995	13.5558	11.7415	10.7987
	105.926	18.2046	80.1345	81.302		109.96		37.5325	32.2594		109.21	71.2606	67.1148	50.9213		86.4366	86.7807	82.0952	86.4482		63.3285	2.37757	2.75715	2.8616
	121.741	15.3114	56.0941	38.4221		92.2101		30.5064	32.9094		94.506	92.184	63.5261	38.6475		118.661	86.0076	68.0779	61.4109		130.821	2.54387	2.61078	2.84904
	72.3333	16.45	69.6268	46.4355		97.8299		34.8724	39.1138		96.2839	92.2836	48.6034	47.7645		94.9022	80.191	79.0758	90.5904		105.851	2.19733	2.53582	2.22437
	114.6	11.9289	14.4176	11.646							108.003	102.043	83.3186	77.2139		115.42	108.148	111.888	110.444		85.9902	3.61433	3.84152	3.35617
	92.6766	11.9353	12.4588	15.2981							105.976	91.4864	94.6111	75.5369		81.5627	83.4193	80.4023	94.1723		107.17	5.83457	7.29063	5.27693
	92.7231	15.2907	13.9294	11.3152							86.0211	87.0828	91.3778	85.3696		103.017	87.8288	98.1176	100.49		106.84	5.97914	7.93088	8.68473
	100.62		11.6439	7.0384
	104.565		9.04713	8.13914
	92.1482		11.1338	8.00935
	107.233
	98.8584
Figure 3E
	ActA	anti-ActRIIA	anti-ActRIIB	anti-ActRIIA and IIB		ActAC	anti-ActRIIA	anti-ActRIIB	anti-ActRIIA and IIB		ActB	anti-ActRIIA	anti-ActRIIB	anti-ActRIIA and IIB
	84.2811	47.0521	49.7101	8.44458		102.365	6.06653	55.9167	1.30852		111.207	30.2923	91.0566	36.2145
	82.6124	51.5994	50.4032	11.7751		98.5347	7.26641	59.8908	1.17422		97.8696	26.8465	101.079	25.8635
	133.106	48.6323	61.2411	9.69329		99.1005	5.08005	67.1097	1.34357		90.923	23.9378	102.703	27.352
	105.414	54.0859	68.9845	15.0028		98.0515	32.7763	57.2066	9.1864		103.34	57.6661	75.4616	9.44995
	97.7591	48.7943	62.7005	13.516		98.8798	28.7025	56.933	9.34968		97.9093	49.6853	79.082	9.90689
	96.8265	56.4504	64.8098	11.7597		103.069	27.7499	59.5545	11.1189		98.7512	56.2143	73.3824	12.7136
	107.331	38.603	72.5022	13.26		107.293	34.2451	56.74	10.0296		109.576	43.3009	99.6231	11.3297
	93.4125	38.9431	72.8169	11.4372		90.2697	27.6723	57.3362	7.96364		100.514	43.7089	83.908	12.6133
	99.2569	36.0267	64.7887	12.3734		102.438	24.4637	50.8235	9.70678		89.9103	26.6745	79.3079	11.5914
	103.829		36.3368	4.04196		104.913		40.0133	2.00355		120.742		29.2249	0.960169
	101.41		41.4511	4.01824		94.2199		38.3981	2.09107		92.4407		29.4112	0.858266
	94.7605		35.545	3.83644		100.867		37.9471	1.77152		86.8178		26.904	0.73566
	110.1		63.9649	31.5219		97.9667		51.0366	8.92967		104.504		51.7894	7.51646
	96.1206		65.5676	28.4473		104.816		62.0481	3.52862		111.02		55.3198	7.4803
	93.7791		62.5078	34.6878		97.2172		47.3486	6.36648		84.4765		56.417	7.20831
	87.7106		82.9929	10.848		108.656		35.3433	2.9937		93.528		70.7145	1.81679
	105.223		76.8004	11.7845		93.2647		33.1012	2.81057		112.976		65.935	1.57624
	107.067		63.9768	12.3064		98.0796		29.8346	2.24251		93.4959		61.1948	1.31993
	96.9937		86.1562	12.4929		105.315		66.9673	14.5217
	93.5554		84.6889	13.6882		103.219		41.0286	13.5507
	109.451		85.5776	14.0094		91.466		30.1542	10.9787
	104.708					117.258
	101.808					92.6
	93.484					90.1424
Figure 3F
	ActAC	anti-ActRIIA	anti-ActRIIB	anti-ActRIIA and IIB		ActC	anti-ActRIIA	anti-ActRIIB	anti-ActRIIA and IIB		ActB	anti-ActRIIA	anti-ActRIIB	anti-ActRIIA and IIB
	112.782	6.4285	61.2706	6.66959		99.3366	12.0145	58.6433	22.9395		101.618	2.31286	50.356	6.21097
	97.1126	7.69383	60.983	6.22526		104.634	10.6785	62.8395	18.7886		99.0321	2.52062	59.0203	6.01576
	90.1057	7.03787	57.9726	6.70254		96.0291	11.2185	64.8009	17.7706		99.3499	2.8216	47.7332	5.72424
	101.416	10.2386	46.9675	1.78979		116.972	26.4209	46.7145	5.22183		107.119	18.8073	44.6824	1.84221
	106.186	10.181	36.5335	2.05767		97.051	26.3233	59.5928	5.26798		97.8199	28.6067	42.3889	1.81167
	92.398	9.64186	37.6482	1.83202		85.9775	20.782	50.2003	4.90394		95.0608	14.5851	32.2467	1.78211
	107.889	12.9327	60.736	9.32989		102.48	38.3881	68.4199	21.9423		109.016		51.2354	8.06249
	95.0586	14.009	55.3287	10.5941		110.454	38.0331	67.006	17.9216		93.8654		42.7491	6.48845
	97.0527	13.5534	28.6791	9.73539		87.0663	36.4373	53.4368	19.5135		97.1182		36.3142	8.18775
	92.7279	6.51961	62.1471	5.00475		100.754	29.4749	59.5343	10.3848		115.414		42.8842	2.64062
	105.666	6.61244	56.3647	4.90834		97.2531	26.7771	45.2799	9.48406		89.6132		48.6298	2.33303
	101.606	5.42708	52.8034	4.33694		101.993	28.1471	64.0631	10.9843		94.9726		30.6442	1.95525
	106.849	2.86186	61.4314	9.62231		108.277		50.29	24.7841		97.8602
	100.808	2.47998	58.8891	8.65682		96.5445		46.6694	24.0193		98.6598
	92.3431	3.25814	55.6709	7.77728		95.1787		57.3465	19.4275		103.48
	94.0254		52.9181	12.7685		119.815		104.628	39.7737
	104.152		56.9417	12.6379		87.7996		94.8172	37.4827
	101.823		52.5604	12.4227		92.3852		90.0742	37.2832
	91.2767		64.342	5.42643		113.519		111.392	40.6821
	116.822		65.4731	5.42164		93.7505		107.389	29.4046
	91.9014		63.0215	4.84253		92.7304		96.1982	33.3775
	110.827		53.3891	3.21201
	87.6852		49.2703	2.56985
	101.488		53.5545	2.74705
