# Supplementary material for: The orphan ligand, activin C, signals through activin receptor-like kinase 7
Source: eLife journal article supplement (doi:10.7554/elife.78197), 2022-06-10
Supplement: data1 [file ActC_Figure4_SourceFile.xlsx]

## Sheet: Sheet1
Figure 4A
	ActA-ALK4				ActAC-ALK4				ActB-ALK4				ActAC-ALK7				ActC-ALK7				ActB-ALK7
	0nM Fs288	12.5nM Fs288	25nM Fs288		0nM Fs288	12.5nM Fs288	25nM Fs288		0nM Fs288	12.5nM Fs288	25nM Fs288		0nM Fs288	12.5nM Fs288	25nM Fs288		0nM Fs288	12.5nM Fs288	25nM Fs288		0nM Fs288	12.5nM Fs288	25nM Fs288
	52.6646	15.0924	16.1159		66.4426	153.886	99.5247		235.516	28.0496	19.3424		86.5977	59.6851	48.4898		95.618	128.125	99.7403		113.276	47.6699	67.7171
	86.2306	18.0714	19.722		96.2039	135.446	100.724		37.9589	24.4322	21.688		110.869	39.4758	39.9094		121.162	114.728	92.568		100.792	48.8905	39.8127
	161.105	21.4845	18.2741		137.353	110.307	71.9215		26.525	32.0815	38.6713		102.534	79.3785	53.7497		83.2202	126.852	123.078		85.932	60.3031	45.9104
	97.2659	9.22012	5.90505		110.855	38.0324	41.0629		91.2883	11.4754	8.76671		88.146	132.952	111.091		152.4	112.644	87.7228		62.2654	72.9036	64.8807
	113.391	8.60099	7.24066		100.114	31.9573	45.1525		113.981	10.015	9.32498		120.548	112.785	116.139		95.9134	133.776	119.265		137.565	58.9027	62.4286
	89.3435	8.49602	6.97591		89.0318	30.9099	40.839		94.7306	8.26723	8.90409		91.3062	127.432	120.381		51.6861	113.801	112.032		100.17	50.1988	57.2707
	115.908	22.1143	23.9486		103.557	71.1213	85.4903		128.046	28.2178	23.8588		105.703	40.7805	43.4377		120.155	113.993	108.594		120.297	32.9085	36.1781
	108.069	24.0163	22.5662		98.0715	57.709	63.4757		76.3812	27.4189	23.2617		100.4	46.872	43.6925		78.6898	93.3217	90.7453		100.986	31.1924	38.7974
	76.0233	15.5038	13.3825		98.3714	68.4176	68.8855		95.5726	24.068	21.2881		93.8968	39.2608	44.7003		101.155	79.2967	91.5714		78.7168	33.4139	35.0001
	117.333	15.2866	15.6319		39.274	41.6297	34.4642		45.1768	31.2815	30.0086		83.8631	21.2245	24.8737		118.938	77.6519	99.6662		113.32	17.1895	15.5068
	87.7885	15.6809	15.5271		50.0895	35.3845	30.0829		141.577	30.5111	30.863		110.955	24.2006	25.724		97.4444	84.9677	83.7282		89.6089	15.2039	15.1005
	94.8781	13.6968	11.765		210.637	36.6555	31.6602		113.247	26.5096	30.3747		105.182	23.7428	25.827		83.6176				97.0709	114.923	76.3693
Figure 4B
	ActA-ALK4				ActAC-ALK4				ActB-ALK4				ActAC-ALK7				ActC-ALK7				ActB-ALK7
	0nM Fstl3	12.5nM Fstl3	25nM Fstl3		0nM Fstl3	12.5nM Fstl3	25nM Fstl3		0nM Fstl3	12.5nM Fstl3	25nM Fstl3		0nM Fstl3	12.5nM Fstl3	25nM Fstl3		0nM Fstl3	12.5nM Fstl3	25nM Fstl3		0nM Fstl3	12.5nM Fstl3	25nM Fstl3
	84.7895	17.7356	9.96203		120.915	38.6406	26.1883		97.4331	73.7598	17.6594		108.342	68.4353	61.8406		106.581	200.601	123.252		66.0061	60.1527	57.406
	106.667	9.1326	11.8348		116.479	89.2851	65.7762		82.9776	43.8518	36.5948		120.194	68.9346	60.5266		77.1431	196.152	125.385		118.222	85.3987	51.9345
	108.544	10.2823	17.0203		62.6065	57.319	22.6566		119.589	77.8573	47.0697		71.4641	53.7019	60.5003		116.276	148.323	116.781		115.771	55.8883	45.9634
	103.009	26.2153	25.6566		58.1359	102.887	54.1224		153.204	57.8976	9.26016		112.932	93.1262	64.6603		69.6651	131.001	90.7184		85.5916	58.6798	38.4511
	103.602	29.254	14.2296		90.9607	115.458	32.3146		125.158	44.1493	15.6497		103.792	90.1738	63.9994		68.1088	121.592	82.9277		105.993	57.6155	56.9999
	93.3888	14.5665	12.7737		150.903	87.2154	39.6615		21.638	53.2933	20.7592		83.2756	72.863	63.4502		162.226	113.826	107.47		108.416	52.2092	46.1555
	105.432	16.931	21.6774		119.009	89.1152	85.7729		106.775	58.6255	44.6792		119.829	39.4415	38.3807		91.0616	123.956	124.449		75.9148	92.4773	59.7807
	104.021	15.602	16.9455		96.9267	99.304	86.9078		93.4959	57.1877	30.9333		91.1358	41.3935	38.8311		109.65	92.3169	129.223		97.5849	55.9165	50.1141
	90.5463	15.8152	13.4744		84.0646	79.679	74.1638		99.7294	42.5986	42.324		89.0357	34.3547	41.7821		99.2889	143.426	119.076		126.5	59.9568	56.7636
	83.0786	17.2645	15.4998		101.325	65.9462	68.2967		115.734	49.5652	34.2508		96.7605	20.2411	18.3731		91.1093	117.651	112.682		113.276	54.584	38.5545
	122.962	21.583	16.4739		91.9543	59.7718	97.8699		103.337	36.8627	34.4464		110.176	23.6024	19.7789		97.2654	114.722	147.313		102.235	50.945	37.5159
	93.959	16.194	16.2779		106.72	106.83	78.4868		80.9295	42.5306	31.2684		93.0639	23.4299	9.69498		111.625	98.152	71.8486		84.4891	58.5771	45.8176
Figure 4C
	Log [M] Inhibin A	ActA-ALK7									ActC- ALK7
	-8	5.2055	11.2312	2.27141	-0.67419	0.591841	1.02601	-8.73794	5.18203	3.21453	-1.61932	1.25827	1.56887	3.29156	14.6885	6.04818	0.788618	16.2881	6.87977
	-8.30103	21.4626	15.2631	26.7181	-0.138252	-1.33767	2.0614	3.8071	4.26134	0.602416	-0.656896	-1.48457	2.95689	2.61374	5.35253	3.98721	-4.68636	9.8377	0.165554
	-8.60206	45.4159	51.2142	22.8716	1.77284	0.900482	5.39954	0.893561	9.16608	11.7098	1.93005	0.88326	5.68353	0.612452	2.43741	3.86668	-1.41811	-0.618013	1.01835
	-8.90309	56.7488	25.5774	15.9505	4.7518	1.86992	5.42197	15.4397	17.6718	19.273	4.31883	1.96503	5.13326	-2.18486	-3.2134	-0.0800929	-2.79995	-0.171294	-3.55389
	-9.20412	62.0176	86.8512	68.0921	4.42006	7.74046	-0.116493	17.8235	26.7937	22.8651	4.1414	7.34263	-0.492903	-2.36972	-0.0498643	7.41428	6.73546	8.87847	9.46331
	-9.50515	77.8099	47.0953	17.7398	16.7429	21.2909	20.2947	32.9576	30.8395	30.7827	16.283	21.5781	20.011	8.05063	9.87171	9.42758	14.2773	12.3089	17.3623
	-9.80618	52.3126	78.3477	79.3396	47.432	61.4055	48.7428	28.4941	51.8623	51.697	47.0722	62.6122	49.8227	11.6804	8.27541	16.1484	33.935	15.0299	37.9273
	-10.1072	89.6241	91.2254	100.892	57.5579	76.316	56.2677	10.9065	42.5625	42.2396	58.8734	77.5815	56.6958	26.0033	13.6111	25.8696	50.9913	41.3409	73.9765
	-10.4082	64.2277	127.379	107.721	78.5665	61.4922	45.7706	54.3219	75.5855	56.6596	80.2757	61.6765	47.5011	46.4355	56.0882	57.9937	105.626	67.0064	99.0093
	-10.7093	99.6366	132.428	115.296	91.4829	85.7627	90.1506	90.0677	85.4245	96.4943	94.277	86.7503	92.429	53.5834	57.5178	72.1872	93.2447	82.5882	103.328
	-11.0103	130.004	150.631	100.033	93.1453	93.7977	71.6586	65.5922	88.2843	122.154	92.9455	93.9407	72.7296	72.1353	82.5273	80.2896	115.617	93.8002	108.543
	-11.3113	90.0797	91.7564	118.164	103.927	106.986	89.0864	97.021	102.78	100.199	104.29	107.574	88.1358	71.0009	99.0422	81.224	111.046	88.0187	100.935
