# Supplementary material for: The orphan ligand, activin C, signals through activin receptor-like kinase 7
Source: eLife journal article supplement (doi:10.7554/elife.78197), 2022-06-10
Supplement: data1 [file ActC_Figure6_SourceFile.xlsx]

## Sheet: Sheet1
Figure 6D
	3T3-L1	SVF
	1.2505	23.5478
	0.799683	41.0232
	1	41.3572
Figure 6G
		Pparg2					Cebpa					Pnpla2					Oil Red O
	No ligand	1.01642	1.0358	1.00195		No ligand	1.10331	1.05441	1.00001		No ligand	1.06805	1.03501	1.0001		No ligand	105.264	93.8471	100.889
	Act A	0.426448	0.398082	0.76582		Act A	0.267779	0.242904	0.936953		Act A	0.390691	0.320429	0.808042		Act A	42.8092	45.6481	45.5628
	Act B	0.339496	0.333506	0.560844		Act B	0.221676	0.28027	0.602333		Act B	0.338721	0.297088	0.444284		Act B	59.4311	61.5693	69.6978
	Act C	1.45328	0.879628	0.939521		Act C	0.822297	0.571359	0.604018		Act C	0.800514	0.510707	0.551483		Act C	81.0083	85.8521	83.4065
