# Supplementary material for: The orphan ligand, activin C, signals through activin receptor-like kinase 7
Source: eLife journal article supplement (doi:10.7554/elife.78197), 2022-06-10
Supplement: data1 [file ActC_SFig1_SourceFile.xlsx]

## Sheet: Sheet1
Figure S1
	ActA+ActC
-7.20761	90.6495	65.0674	82.536	128.549	122.341	117.145	80.1652	95.0417	97.9695
-7.50864	84.9245	71.8119	70.5213	95.0082	105.475	91.8892	89.1564	111.699	93.6917
-7.80967	81.5756	75.9241	81.1001	86.9819	95.4399	91.0344	81.4474	88.6004	83.4231
-8.1107	87.5042	69.6057	74.6251	93.6406	95.895	104.357	85.0098	91.3878	81.2698
-8.41173	83.8054	74.6008	74.4939	79.0327	100.177	98.0683	79.8148	86.9901	79.4013
-8.71276	92.81	73.2763	74.9491	70.5344	103.124	89.4254	82.9128	83.5534	86.2548
-9.01379	97.1162	82.8634	80.8971	67.0087	105.382	102.789	109.753	88.28	84.206
-9.31482				57.7165	115.119	105.93	120.868	81.9606	92.2917
-9.61585				89.1051	111.15	120.768	104.75	84.1606	85.5763
-9.91688				88.988	91.6501	88.8741	107.287	99.1472	85.4317
